# Supplementary material for: Structural diversity of copper(i)–ethylene complexes with 2,4-bis(2-pyridyl)pyrimidine directed by anions
Source: Royal Society of Chemistry journal article supplement (doi:10.1039/d3dt02618c), 2023-01-01
Supplement: d3dt02618c1.pdf [file d3dt02618c1.pdf]

[Electronic supplementary information (ESI)]

Structural diversity of copper(I) ethylene complexes with 2,4-bis(2-pyridyl)pyrimidine directed by anions

Masahiko Maekawa,<sup>a,\*</sup> Terumasa Hayashi,<sup>b</sup> Kuniyoshi Sugimoto,<sup>b</sup> Takashi Okubo,<sup>b</sup> Takayoshi Kuroda-Sowa<sup>b</sup>

<sup>a</sup> Research Institute for Science and Technology, Kindai University, Kowakae, Higashi-Osaka, Osaka 577-8502, Japan. E-mail: maekawa@rist.kindai.ac.jp

<sup>b</sup> Department of Chemistry, Kindai University, Kowakae, Higashi-Osaka, Osaka 577-8502, Japan

Table S1 Crystallographic data for Cu(I)-bpprd/C<sub>2</sub>H<sub>4</sub> complexes 1–4

|                                             | [Cu <sub>2</sub> (bpprd)(η <sup>2</sup> -C <sub>2</sub> H <sub>4</sub> ) <sub>2</sub> (ClO <sub>4</sub> ) <sub>2</sub> ] ( <b>1</b> ) | [Cu <sub>4</sub> (bpprd) <sub>2</sub> (η <sup>2</sup> -C <sub>2</sub> H <sub>4</sub> ) <sub>4</sub> (μ-NO <sub>3</sub> ) <sub>2</sub> ](NO <sub>3</sub> ) <sub>2</sub> ( <b>2</b> ) | [Cu <sub>2</sub> (bpprd)(η <sup>2</sup> -C <sub>2</sub> H <sub>4</sub> ) <sub>2</sub> (BF <sub>4</sub> )]BF <sub>4</sub> ( <b>3</b> ) | {[Cu <sub>6</sub> (bpprd) <sub>4</sub> (η <sup>2</sup> -C <sub>2</sub> H <sub>4</sub> ) <sub>2</sub> (μ-η <sup>2</sup> :η <sup>2</sup> -C <sub>2</sub> H <sub>4</sub> )(μ-BF <sub>4</sub> ) <sub>2</sub> ](BF <sub>4</sub> ) <sub>4</sub> ] <sub>n</sub> ( <b>4</b> ) |
|---------------------------------------------|---------------------------------------------------------------------------------------------------------------------------------------|-------------------------------------------------------------------------------------------------------------------------------------------------------------------------------------|---------------------------------------------------------------------------------------------------------------------------------------|-----------------------------------------------------------------------------------------------------------------------------------------------------------------------------------------------------------------------------------------------------------------------|
| Formula                                     | C <sub>18</sub> H <sub>18</sub> Cl <sub>2</sub> Cu <sub>2</sub> N <sub>4</sub> O <sub>8</sub>                                         | C <sub>18</sub> H <sub>18</sub> Cu <sub>2</sub> N <sub>6</sub> O <sub>6</sub>                                                                                                       | C <sub>18</sub> H <sub>18</sub> B <sub>2</sub> Cu <sub>2</sub> F <sub>8</sub> N <sub>4</sub>                                          | C <sub>62</sub> H <sub>52</sub> B <sub>6</sub> Cu <sub>6</sub> F <sub>24</sub> N <sub>16</sub>                                                                                                                                                                        |
| Formula Weight                              | 616.34                                                                                                                                | 541.46                                                                                                                                                                              | 591.06                                                                                                                                | 1923.29                                                                                                                                                                                                                                                               |
| Crystal System                              | monoclinic                                                                                                                            | triclinic                                                                                                                                                                           | monoclinic                                                                                                                            | monoclinic                                                                                                                                                                                                                                                            |
| Space Group                                 | <i>P</i> 2 <sub>1</sub> / <i>c</i> (No. 14)                                                                                           | <i>P</i> 1(-) (No. 2)                                                                                                                                                               | <i>P</i> 2 <sub>1</sub> / <i>c</i> (No. 14)                                                                                           | <i>C</i> 2 <sub>1</sub> / <i>c</i> (No. 15)                                                                                                                                                                                                                           |
| <i>a</i> /Å                                 | 11.3225(3)                                                                                                                            | 9.3576(3)                                                                                                                                                                           | 11.1296(4)                                                                                                                            | 22.7929(6)                                                                                                                                                                                                                                                            |
| <i>b</i> /Å                                 | 13.0447(4)                                                                                                                            | 10.9852(6)                                                                                                                                                                          | 12.9401(4)                                                                                                                            | 11.3730(2)                                                                                                                                                                                                                                                            |
| <i>c</i> /Å                                 | 15.7577(5)                                                                                                                            | 11.9635(7)                                                                                                                                                                          | 15.7337(7)                                                                                                                            | 29.0946(7)                                                                                                                                                                                                                                                            |
| <i>α</i> /°                                 | 90                                                                                                                                    | 64.609(5)                                                                                                                                                                           | 90                                                                                                                                    | 90                                                                                                                                                                                                                                                                    |
| <i>β</i> /°                                 | 109.276(3)                                                                                                                            | 67.153(4)                                                                                                                                                                           | 109.055(4)                                                                                                                            | 109.594(3)                                                                                                                                                                                                                                                            |
| <i>γ</i> /°                                 | 90                                                                                                                                    | 84.922(4)                                                                                                                                                                           | 90                                                                                                                                    | 90                                                                                                                                                                                                                                                                    |
| <i>V</i> /Å <sup>3</sup>                    | 2196.91(12)                                                                                                                           | 1019.33(10)                                                                                                                                                                         | 2141.78(15)                                                                                                                           | 7105.3(3)                                                                                                                                                                                                                                                             |
| <i>Z</i>                                    | 4                                                                                                                                     | 2                                                                                                                                                                                   | 4                                                                                                                                     | 4                                                                                                                                                                                                                                                                     |
| <i>D</i> <sub>calc</sub> /gcm <sup>-3</sup> | 1.863                                                                                                                                 | 1.764                                                                                                                                                                               | 1.833                                                                                                                                 | 1.798                                                                                                                                                                                                                                                                 |
| <i>F</i> (000)                              | 1240.0                                                                                                                                | 548.0                                                                                                                                                                               | 1176.0                                                                                                                                | 3824.0                                                                                                                                                                                                                                                                |
| <i>μ</i> (MoKα) /mm <sup>-1</sup>           | 2.235                                                                                                                                 | 2.137                                                                                                                                                                               | 2.070                                                                                                                                 | 1.881                                                                                                                                                                                                                                                                 |
| Temperature /K                              | 100.15                                                                                                                                | 100.15                                                                                                                                                                              | 97.15                                                                                                                                 | 97.15                                                                                                                                                                                                                                                                 |
| Observed reflections                        | 26013 ( <i>R</i> <sub>int</sub> = 0.0640)                                                                                             | 19629 ( <i>R</i> <sub>int</sub> = 0.0577)                                                                                                                                           | 31668 ( <i>R</i> <sub>int</sub> = 0.0556)                                                                                             | 50700 ( <i>R</i> <sub>int</sub> = 0.0281)                                                                                                                                                                                                                             |
| Refined reflections                         | 6603 (all data); 5613 ( <i>I</i> > 2σ( <i>I</i> ))                                                                                    | 6011 (all data); 5130 ( <i>I</i> > 2σ( <i>I</i> ))                                                                                                                                  | 6502 (all data); 5816 ( <i>I</i> > 2σ( <i>I</i> ))                                                                                    | 10738 (all data); 9477 ( <i>I</i> > 2σ( <i>I</i> ))                                                                                                                                                                                                                   |
| <i>R</i>                                    | 0.0462 (all data)                                                                                                                     | 0.0396 (all data)                                                                                                                                                                   | 0.0355 (all data)                                                                                                                     | 0.0408 (all data)                                                                                                                                                                                                                                                     |
| <i>R</i> <sub>1</sub>                       | 0.0381 ( <i>I</i> > 2σ( <i>I</i> ))                                                                                                   | 0.0325 ( <i>I</i> > 2σ( <i>I</i> ))                                                                                                                                                 | 0.0306 ( <i>I</i> > 2σ( <i>I</i> ))                                                                                                   | 0.0356 ( <i>I</i> > 2σ( <i>I</i> ))                                                                                                                                                                                                                                   |
| <i>wR</i> <sub>2</sub>                      | 0.1080 (all data)                                                                                                                     | 0.0855 (all data)                                                                                                                                                                   | 0.0776 (all data)                                                                                                                     | 0.0944 (all data)                                                                                                                                                                                                                                                     |
| GOF                                         | 1.072                                                                                                                                 | 1.048                                                                                                                                                                               | 1.031                                                                                                                                 | 1.041                                                                                                                                                                                                                                                                 |

$$R = \sum ||F_o| - |F_c|| / \sum |F_o|. R_1 = \sum ||F_o| - |F_c|| / \sum |F_o| (F_o > 4\sigma(F_o)). wR_2 = [\sum (w(F_o^2 - F_c^2))^2 / \sum w(F_o^2)]^{1/2}.$$

**Table S2** Selected bond lengths (Å) and bond angles (°) of Cu(I)–bpprd/C<sub>2</sub>H<sub>4</sub> complexes **1–4**

|                                                                                                                                                                    |            |                   |                |
|--------------------------------------------------------------------------------------------------------------------------------------------------------------------|------------|-------------------|----------------|
| <b>(a) [Cu<sub>2</sub>(bpprd)(η<sup>2</sup>-C<sub>2</sub>H<sub>4</sub>)<sub>2</sub>(ClO<sub>4</sub>)<sub>2</sub>] (1)</b>                                          |            |                   |                |
| Cu(1)-N(1)                                                                                                                                                         | 1.9705(18) | Cu(1)-N(2)        | 2.0573(17)     |
| Cu(1)-C(15)                                                                                                                                                        | 2.010(2)   | Cu(1)-C(16)       | 2.027(2)       |
| Cu(1)-O(1)                                                                                                                                                         | 2.573(2)   | Cu(2)-N(3)        | 1.9988(19)     |
| Cu(2)-N(4)                                                                                                                                                         | 1.9990(17) | Cu(2)-C(17)       | 1.998(2)       |
| Cu(2)-C(18)                                                                                                                                                        | 2.010(2)   | Cu(2)-O(7)        | 2.507(2)       |
| C(15)=C(16)                                                                                                                                                        | 1.361(3)   | C(17)=C(18)       | 1.370(4)       |
| N(1)-Cu(1)-N(2)                                                                                                                                                    | 82.10(7)   | N(1)-Cu(1)-C(15)  | 113.08(9)      |
| N(1)-Cu(1)-C(16)                                                                                                                                                   | 152.19(9)  | N(1)-Cu(1)-O(1)   | 92.00(7)       |
| N(2)-Cu(1)-C(15)                                                                                                                                                   | 158.88(8)  | N(2)-Cu(1)-C(16)  | 123.28(8)      |
| N(2)-Cu(1)-O(1)                                                                                                                                                    | 96.06(7)   | C(15)-Cu(1)-C(16) | 39.41(10)      |
| C(15)-Cu(1)-O(1)                                                                                                                                                   | 97.88(8)   | C(16)-Cu(1)-O(1)  | 95.85(8)       |
| N(3)-Cu(2)-N(4)                                                                                                                                                    | 83.15(7)   | N(3)-Cu(2)-C(18)  | 155.41(9)      |
| N(3)-Cu(2)-C(17)                                                                                                                                                   | 116.28(9)  | N(3)-Cu(2)-O(7)   | 87.26(7)       |
| N(4)-Cu(2)-C(17)                                                                                                                                                   | 159.12(9)  | N(4)-Cu(2)-C(18)  | 119.64(9)      |
| N(4)-Cu(2)-O(7)                                                                                                                                                    | 90.32(7)   | C(17)-Cu(2)-C(18) | 39.97(11)      |
| C(17)-Cu(2)-O(7)                                                                                                                                                   | 97.81(9)   | C(18)-Cu(2)-O(7)  | 100.78(9)      |
| <b>(b) [Cu<sub>4</sub>(bpprd)<sub>2</sub>(η<sup>2</sup>-C<sub>2</sub>H<sub>4</sub>)<sub>4</sub>(μ-NO<sub>3</sub>)<sub>2</sub>](NO<sub>3</sub>)<sub>2</sub> (2)</b> |            |                   |                |
| Cu(1)-N(1)                                                                                                                                                         | 2.0016(14) | Cu(1)-N(2)        | 2.2922(13)     |
| Cu(1)-C(15)                                                                                                                                                        | 2.0347(16) | Cu(1)-C(16)       | 2.0374(17)     |
| Cu(1)-O(1)                                                                                                                                                         | 2.0615(12) | Cu(2)-N(3)        | 1.9826(14)     |
| Cu(2)-N(4)                                                                                                                                                         | 2.0151(13) | Cu(2)-C(17)       | 2.0166(17)     |
| Cu(2)-C(18)                                                                                                                                                        | 2.0169(17) | Cu(2)-O(2')       | 2.444(1)       |
| C(15)=C(16)                                                                                                                                                        | 1.364(3)   | C(17)=C(18)       | 1.373(3)       |
| N(1)-Cu(1)-N(2)                                                                                                                                                    | 77.93(5)   | N(1)-Cu(1)-C(15)  | 149.59(7)      |
| N(1)-Cu(1)-C(16)                                                                                                                                                   | 110.84(6)  | N(1)-Cu(1)-O(1)   | 98.62(5)       |
| N(2)-C(15)-C(16)                                                                                                                                                   | 111.97(6)  | N(2)-Cu(1)-C(16)  | 108.30(6)      |
| N(2)-Cu(1)-O(1)                                                                                                                                                    | 95.09(5)   | C(15)-Cu(1)-C(16) | 39.15(7)       |
| C(15)-Cu(1)-O(1)                                                                                                                                                   | 108.59(7)  | C(16)-Cu(1)-O(1)  | 145.33(6)      |
| N(3)-Cu(2)-N(4)                                                                                                                                                    | 83.02(6)   | N(3)-Cu(2)-C(17)  | 113.25(6)      |
| N(3)-Cu(2)-C(18)                                                                                                                                                   | 149.59(7)  | N(3)-Cu(2)-O(2')  | 101.58(6)      |
| N(4)-Cu(2)-C(17)                                                                                                                                                   | 156.16(7)  | N(4)-Cu(2)-C(18)  | 118.86(7)      |
| N(4)-Cu(2)-O(2')                                                                                                                                                   | 103.33(6)  | C(17)-Cu(2)-C(18) | 39.81(7)       |
| C(17)-Cu(2)-O(2')                                                                                                                                                  | 90.76(7)   | C(18)-Cu(2)-O(2') | 93.87(7)       |
| <b>(c) [Cu<sub>2</sub>(bpprd)(η<sup>2</sup>-C<sub>2</sub>H<sub>4</sub>)<sub>2</sub>(BF<sub>4</sub>)]BF<sub>4</sub> (3)</b>                                         |            |                   |                |
| Cu(1)-N(1)                                                                                                                                                         | 1.9664(14) | Cu(1)-N(2)        | 2.0551(13)     |
| Cu(1)-C(15)                                                                                                                                                        | 2.0025(16) | Cu(1)-C(16)       | 2.0192(17)     |
| Cu(2)-N(3)                                                                                                                                                         | .9894(14)  | Cu(2)-N(4)        | 1.9967(13) . ? |
| Cu(2)-C(17)                                                                                                                                                        | 1.9976(17) | Cu(2)-C(18)       | 2.0002(17)     |
| Cu(2)-F(8)                                                                                                                                                         | 2.586(2)   | C(15)=C(16)       | 1.370(2)       |
| C(17)=C(18)                                                                                                                                                        | 1.368(3)   |                   |                |
| N(1)-Cu(1)-N(2)                                                                                                                                                    | 82.35(5)   | N(1)-Cu(1)-C(15)  | 112.19(7)      |

|                  |           |                   |           |
|------------------|-----------|-------------------|-----------|
| N(1)-Cu(1)-C(16) | 151.94(7) | N(2)-Cu(1)-C(15)  | 161.96(6) |
| N(2)-Cu(1)-C(16) | 124.66(6) | C(15)-Cu(1)-C(16) | 39.82(7)  |
| N(3)-Cu(2)-N(4)  | 83.54(5)  | N(3)-Cu(2)-C(17)  | 116.70(7) |
| N(3)-Cu(2)-C(18) | 156.25(7) | N(3)-Cu(2)-F(8)   | 83.20(5)  |
| N(4)-Cu(2)-C(17) | 159.05(7) | N(4)-Cu(2)-C(18)  | 119.23(7) |
| N(4)-Cu(2)-F(8)  | 85.58(5)  | C(17)-Cu(2)-C(18) | 40.04(8)  |
| C(17)-Cu(2)-F(8) | 101.42(5) | C(18)-Cu(2)-F(8)  | 103.96(7) |

(d)  $\{[\text{Cu}_6(\text{bpprd})_4(\eta^2\text{-C}_2\text{H}_4)_2(\mu\text{-}\eta^2\text{:}\eta^2\text{-C}_2\text{H}_4)(\mu\text{-BF}_4)_2](\text{BF}_4)_4\}_n$  (**4**)

|                    |            |                     |            |
|--------------------|------------|---------------------|------------|
| Cu(1)-N(1)         | 1.9697(15) | Cu(1)-N(2)          | 2.1450(15) |
| Cu(2)-N(3)         | 1.9774(15) | Cu(2)-N(4)          | 1.9873(15) |
| Cu(2)-F(2)         | 2.543(1)   | Cu(2)-C(29)         | 2.0130(18) |
| Cu(3)-N(5)         | 1.9222(16) | Cu(3)-N(6)          | 2.3470(17) |
| Cu(4)-N(7)         | 1.982(2)   | Cu(4)-N(8)          | 2.0020(19) |
| Cu(4)-F(1)         | 2.591(1)   | Cu(4)-C(30)         | 1.997(3)   |
| Cu(4)-C(31)        | 2.004(2)   | C(29)=C(29'')       | 1.436(2)   |
| C(30)=C(31)        | 1.365(5)   |                     |            |
| N(1)-Cu(1)-N(2)    | 80.77(6)   | N(1)-Cu(1)-N(1')    | 156.61(9)  |
| N(1)-Cu(1)-N(2')   | 109.96(6)  | N(2)-Cu(1)-N(2')    | 126.97(8)  |
| N(3)-Cu(2)-N(4)    | 83.99(6)   | N(3)-Cu(2)-C(29'')  | 160.73(7)  |
| N(3)-Cu(2)-C(29)   | 119.11(7)  | N(4)-Cu(2)-C(29'')  | 115.00(7)  |
| N(4)-Cu(2)-C(29)   | 156.80(7)  | F(2)-Cu(2)-C(29)    | 96.71(6)   |
| F(2)-Cu(2)-C(29'') | 92.19(6)   | F(2)-Cu(2)-N(3)     | 87.31(6)   |
| F(2)-Cu(2)-N(4)    | 81.32(6)   | C(29)-Cu(2)-C(29'') | 41.82(9)   |
| N(5)-Cu(3)-N(6)    | 79.91(6)   | N(5)-Cu(3)-N(5')    | 160.82(10) |
| N(5)-Cu(3)-N(6')   | 107.68(6)  | N(6)-Cu(3)-N(6')    | 134.67(8)  |
| N(7)-Cu(4)-N(8)    | 82.53(8)   | N(7)-Cu(4)-C(30)    | 160.82(12) |
| N(7)-Cu(4)-C(31)   | 120.93(11) | N(8)-Cu(4)-C(30)    | 116.56(12) |
| N(8)-Cu(4)-C(31)   | 156.04(11) | F(1)-Cu(4)-C(30)    | 101.3(1)   |
| F(1)-Cu(4)-C(31)   | 96.97(9)   | F(1)-Cu(4)-N(7)     | 78.52(6)   |
| F(1)-Cu(4)-N(8)    | 82.52(6)   | C(30)-Cu(4)-C(31)   | 39.89(14)  |

Symmetry codes. Complex **1**: (i): x, y, z. Complex **2**: (i): x, y, z; (ii(')): 1-x, 1-y, 1-z. Complex **3**: (i): x, y, z. Complex **4**: (i): x, y, z; (ii(')): 1-x, y, 3/2-z; (iii(')): 1-x, 1-y, 1-z.

**Table S3** The selected dihedral angles (°) of Cu(I)–bpprd/C<sub>2</sub>H<sub>4</sub> complexes **1–4**

| Complexes                                                                                                                                                                                                                                                             | Plane 1 <sup>a</sup> | Plane 2 <sup>a</sup> | Dihedral angles (°) |
|-----------------------------------------------------------------------------------------------------------------------------------------------------------------------------------------------------------------------------------------------------------------------|----------------------|----------------------|---------------------|
| [Cu <sub>2</sub> (bpprd)(η <sup>2</sup> -C <sub>2</sub> H <sub>4</sub> ) <sub>2</sub> (ClO <sub>4</sub> ) <sub>2</sub> ] ( <b>1</b> )                                                                                                                                 | A                    | B                    | 13.31               |
|                                                                                                                                                                                                                                                                       | B                    | C                    | 20.40               |
| [Cu <sub>4</sub> (bpprd) <sub>2</sub> (η <sup>2</sup> -C <sub>2</sub> H <sub>4</sub> ) <sub>4</sub> (μ-NO <sub>3</sub> ) <sub>2</sub> ](NO <sub>3</sub> ) <sub>2</sub> ( <b>2</b> )                                                                                   | A                    | B                    | 18.43               |
|                                                                                                                                                                                                                                                                       | B                    | C                    | 10.76               |
| [Cu <sub>2</sub> (bpprd)(η <sup>2</sup> -C <sub>2</sub> H <sub>4</sub> ) <sub>2</sub> (BF <sub>4</sub> )]BF <sub>4</sub> ( <b>3</b> )                                                                                                                                 | A                    | B                    | 15.42               |
|                                                                                                                                                                                                                                                                       | B                    | C                    | 20.39               |
| {[Cu <sub>6</sub> (bpprd) <sub>4</sub> (η <sup>2</sup> -C <sub>2</sub> H <sub>4</sub> ) <sub>2</sub> (μ-η <sup>2</sup> :η <sup>2</sup> -C <sub>2</sub> H <sub>4</sub> )(μ-BF <sub>4</sub> ) <sub>2</sub> ](BF <sub>4</sub> ) <sub>4</sub> ] <sub>n</sub> ( <b>4</b> ) | A                    | B                    | 13.90 <sup>b</sup>  |
|                                                                                                                                                                                                                                                                       | B                    | C                    | 24.34 <sup>b</sup>  |
|                                                                                                                                                                                                                                                                       | A                    | B                    | 15.84 <sup>c</sup>  |
|                                                                                                                                                                                                                                                                       | B                    | C                    | 25.29 <sup>c</sup>  |

<sup>a</sup> The terminal pyridyl rings (A) and (C), and the central pyrimidine ring (B) are shown in Figs **1-4**, respectively.

<sup>b</sup> The [Cu<sub>3</sub>(bpprd)<sub>2</sub>(η<sup>2</sup>-C<sub>2</sub>H<sub>4</sub>)<sub>2</sub>]<sup>3+</sup> cation moiety.

<sup>c</sup> The [Cu<sub>3</sub>(bpprd)<sub>2</sub>(μ-η<sup>2</sup>:η<sup>2</sup>-C<sub>2</sub>H<sub>4</sub>)]<sup>3+</sup> cation moiety.
